# Supplementary material for: The HIST1 Locus Escapes Reprogramming in Cloned Bovine Embryos
Source: PubMed Central journal article supplement (PMC4856087; doi:10.1534/g3.115.026666), 2016-03-11
Supplement: supp_g3.115.026666_FigureS1.pdf [file supp_g3.115.026666_FigureS1.pdf]

A

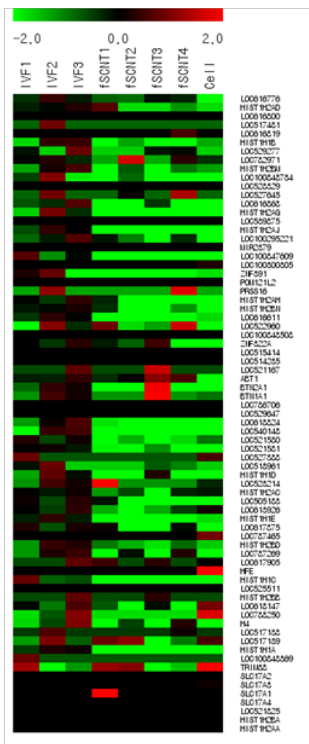

B

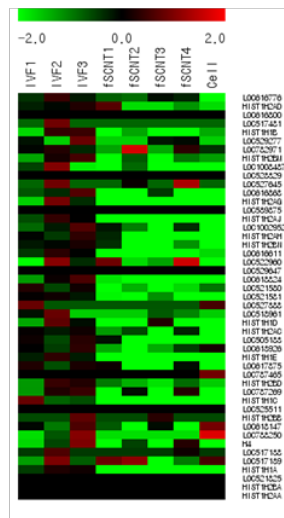

C

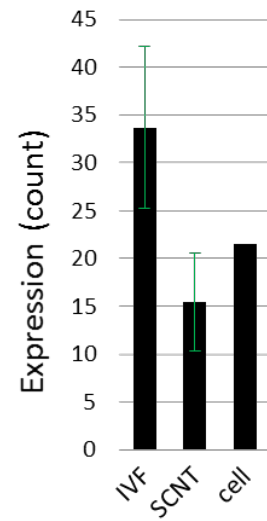

**Figure S1. *HIST1* downregulation in the donor cells**

A. Heatmap showing relative expression against IVF mean expression at *HIST1* locus in IVF, fSCNT, and the donor cell groups.

B. Heatmap showing relative expression against IVF mean expression of *HIST1* histone genes in IVF, fSCNT, and the donor cell groups.

C. Average expression levels of *HIST1* histone genes in IVF, fSCNT, and the donor cell groups. Error bars indicate standard deviations of replicates.
