# Supplementary material for: The HIST1 Locus Escapes Reprogramming in Cloned Bovine Embryos
Source: PubMed Central journal article supplement (PMC4856087; doi:10.1534/g3.115.026666), 2016-03-11
Supplement: supp_g3.115.026666_FigureS2.pdf [file supp_g3.115.026666_FigureS2.pdf]

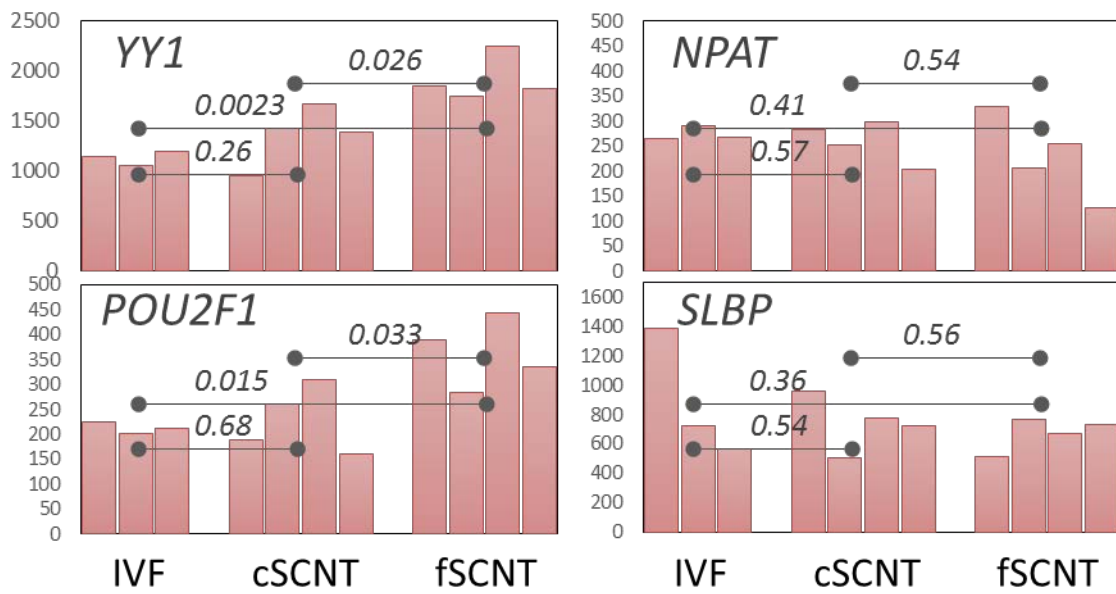

**Figure S2. Expression levels of histone gene expression regulators in individual blastocysts**

Expression levels of factors known to regulate coordinated histone gene expressions in each blastocyst were compared.
